# Supplementary material for: Oral Administration of Lotus-Seed Resistant Starch Protects against Food Allergy
Source: MDPI journal article supplement (doi:10.3390/foods12040737), 2023-02-08
Supplement: s1 [file s1]

Supplementary Table S1

Table S1. Primers specific for 16S rDNA.

| Primer  | Sequence (5'-3') |
|---------|------------------|
| Forward | TACGGRAGGCAGCAG  |
| Reverse | AGGGTATCTAATCCT  |

Supplementary Figure S1

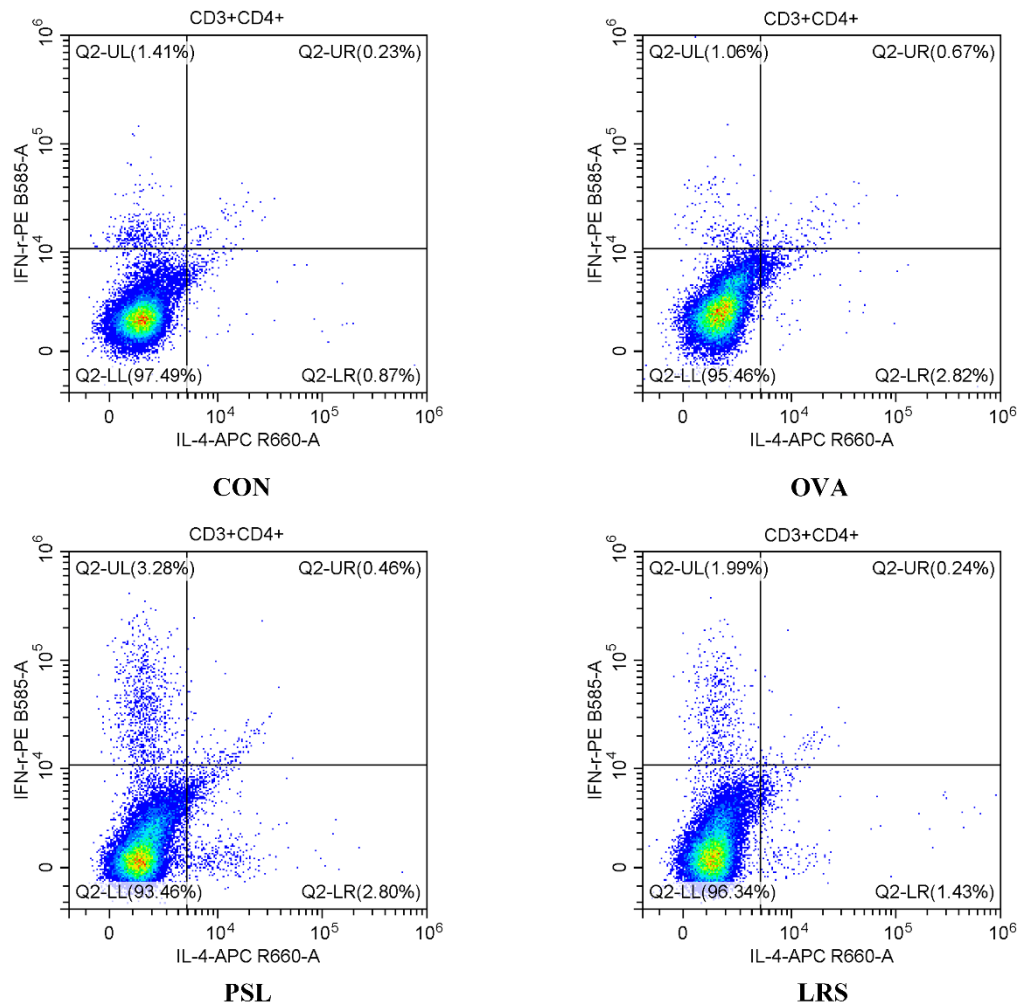

Figure S1. Representative flow cytometry dot plots depicting Th1 and Th2 staining.
